# Supplementary material for: Wiskott-Aldrich syndrome protein forms nuclear condensates and regulates alternative splicing
Source: PubMed Central journal article supplement (PMC9233711; doi:10.1038/s41467-022-31220-8), 2022-06-25
Supplement: 41467_2022_31220_MOESM1_ESM.pdf [file 41467_2022_31220_MOESM1_ESM.pdf]

## **SUPPLEMENTARY INFORMATION**

SUPPLEMENTAL Fig. S1-S12

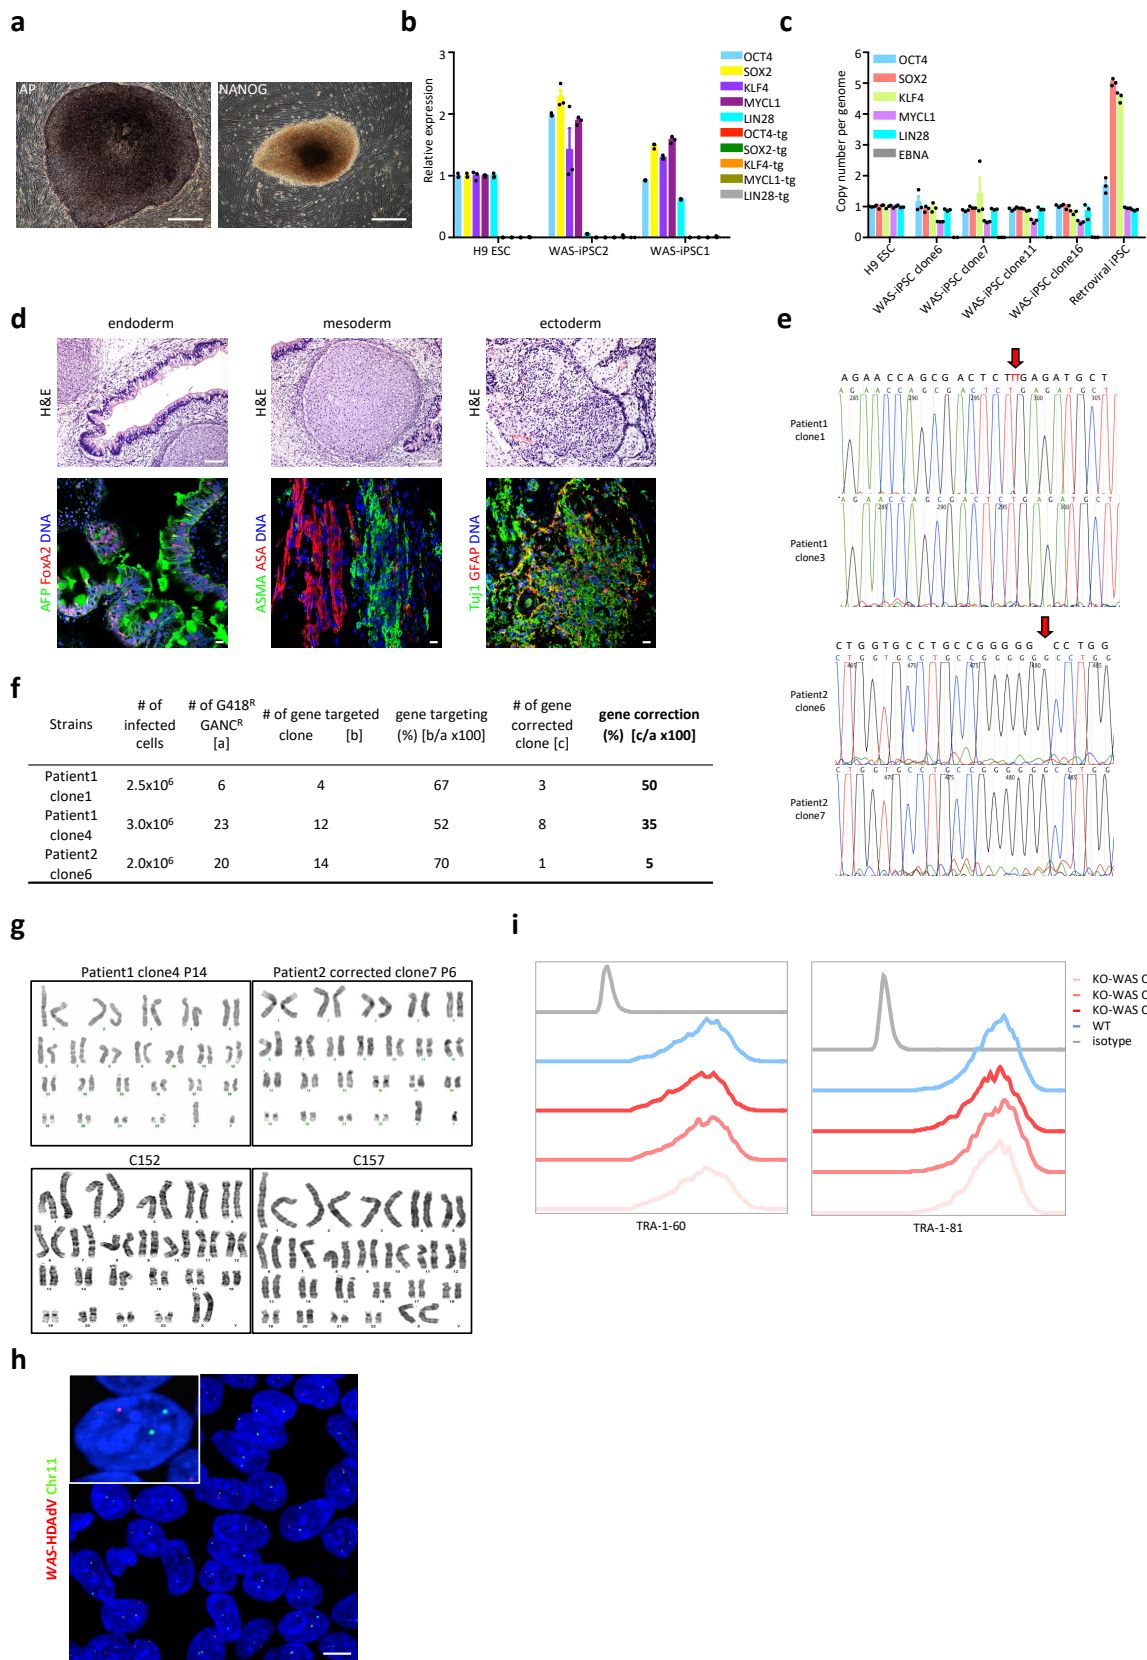

**Fig. S1 Generation of WAS-specific iPSCs and isogenic gene-corrected iPSCs, related to Fig. 1.**

(a) Representative Alkaline phosphatase (AP) and NANOG immunostaining of colonies of reprogrammed WAS patient fibroblasts. Scale bar = 0.5 mm. The experiment was repeated at least 3 times independently.

(b) Quantitative RT-PCR (qRT-PCR) analysis of the expression of endogenous pluripotency transcription factors (*Oct4*, *Sox2*, *Klf4*, *Mycl1* and *Lin28*) or transgenes (*Oct4-tg*, *Sox2-tg*, *Klf4-tg*, *Mycl1-tg* and *Lin28-tg*) in the two patient WAS-iPSCs. No exogenous reprogramming factor expression was detected. The qPCR was performed in triplicate per sample, data are shown as mean  $\pm$  SEM.

(c) Quantification of the copy number of episomal vectors that may integrate in the genome. No ectopic reprogramming factor or episomal vector sequence was detected. An iPSC line generated with integrative retroviruses was included as a control. Copy numbers of the reprogramming factor transgenes were normalized by the copy number of the same gene in the H9 ESC, except for copy numbers of *EBNA1* that doesn't exist in H9 ESC and were normalized by copy number of the *FBXO15* gene. Mean  $\pm$  SEM, biological replicate for WAS iPSCs  $n = 4$ , for H9 ESCs  $n = 1$ , for retroviral iPSC  $n = 1$ .

(d) Representative hematoxylin and eosin (H&E) histological staining and immunostaining in teratomas derived from a randomly selected gene-corrected WAS-iPSC clone show in vivo differentiation towards ectodermal, mesodermal and endodermal tissues. The experiment was repeated at least 3 times independently. Scale bar = 50  $\mu$ m.

(e) Verification of patient specific mutations by DNA sequencing in WAS-iPSC clones. Wild-type sequence is shown on top of the chromatographs.

(f) Gene-targeting and gene-correction efficiencies at the WAS locus in WAS-iPSCs achieved in multiple clones.

(g) Karyotyping analysis revealed normal karyotypes in randomly selected clones of WAS-iPSC lines, either before or after gene editing.

(h) Representative fluorescence in situ hybridization image of random integration of WAS-c-HDA $\nu$ . Interphase iPSC nuclei were hybridized with a TAMRA-labeled probe specific for WAS-c-HDA $\nu$ . Gene-corrected WAS-iPSCs showed one hybridization signal (red puncta) per nucleus. A chromosome 11 probe (green puncta) was used as control. Scale bar = 10  $\mu$ m. Blue: DAPI. The experiment was done once.

(i) FACS analysis of cell surface pluripotency markers TRA-1-60 and TRA-1-81 in WT and KO-iPSCs.

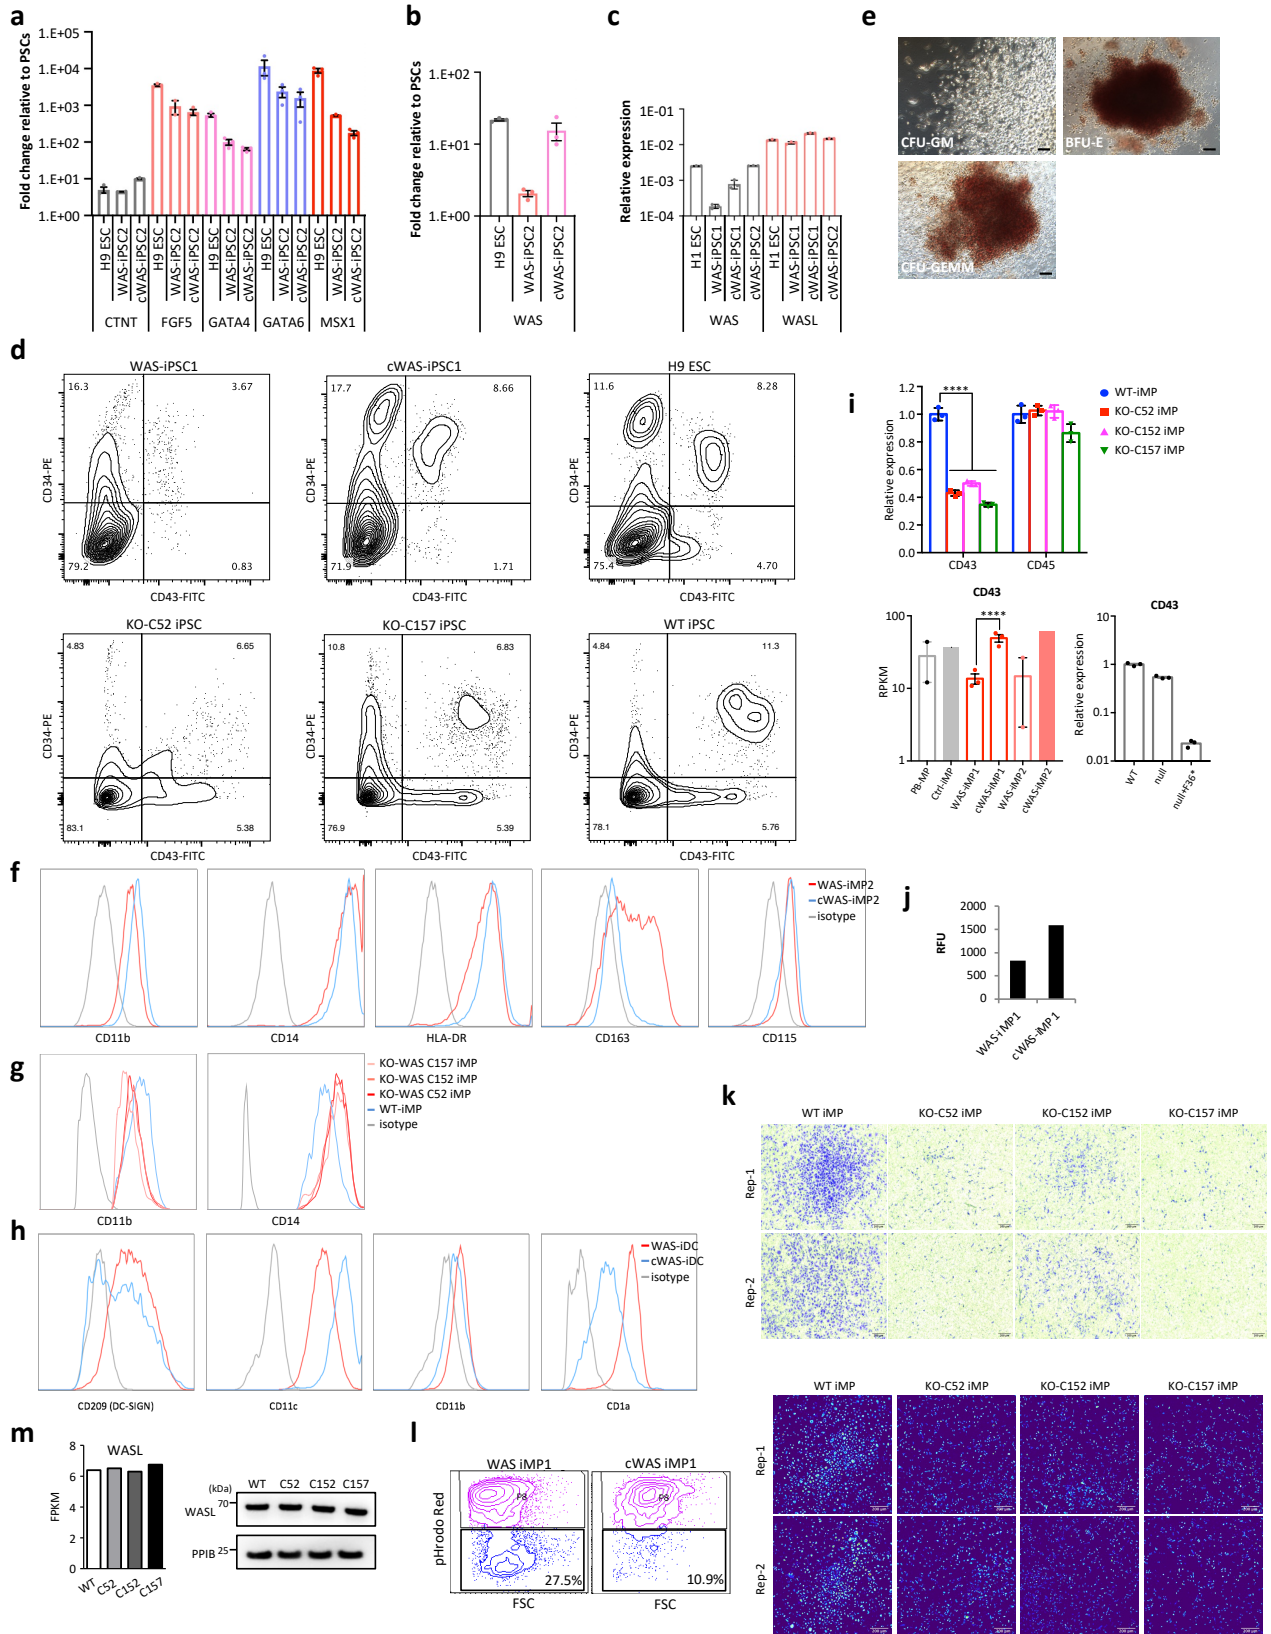



## Fig. S2 Recapitulation of WAS phenotypes using isogenic WAS iPSC models to Fig. 2.

(a-c) qRT-PCR analysis of the expression of: endodermal (*GATA4* and *GATA6*), mesodermal (*CTnT* and *MSX1*), and ectodermal (*FGF5*) genes in embryoid bodies (EBs) generated from H9 ESCs, WAS-iPSCs and cWAS-iPSCs (a); the *WAS* gene in EBs generated from H9 ESCs, WAS-iPSCs and cWAS-iPSCs (b); and the *WAS* and *WASL* genes in ESCs and iPSCs following hematopoietic differentiation (c). The qPCR was performed in triplicate per sample, data are shown as mean  $\pm$  SD.

(d) Representative FACS analysis of HPC populations in differentiated iPSCs and ESCs. Cells are in the Tra-1-85+ gate. Numbers represent percentages.

(e) Representative images of hematopoietic colonies differentiated from WAS-iPSCs. Bar = 0.1 mm. The experiment was repeated at least 3 times independently.

(f-h) FACS analysis of iMPs and iDCs. Histograms show expression of typical cell surface markers of macrophages (f, g) and dendritic cells (h).

(i) Top: qRT-PCR analysis of the *CD43* gene in KO iMPs. Biological replicate n=3. \*\*\*\* $p < 0.0001$ ; bottom: expression values of *CD43* measured in RPKM (Reads Per Kilobase of transcript per Million mapped reads) in macrophages, biological replicate n=2 (PB-MP), 1 (Ctrl-iMP), 3 (WAS-iMP1 and cWAS-iMP1), 2 (WAS-iMP2), 1 (cWAS-iMP2). Hypergeometric testing P-values are corrected for multiple testing using FDR, \*\*\*\* $p = 5 \times 10^{-5}$ ; bottom right: qRT-PCR analysis of the expression of the *CD43* gene in B cells. The qPCR was performed in triplicate per sample, data are shown as mean  $\pm$  SD.

(j) Quantitative measurement of transwell migration of iMPs (n=1) as shown in Fig. 2C. RFU: relative fluorescence unit.

(k) Transwell migration assay as shown in Fig. 2c. The experiment was repeated 3 times independently. Scale bar = 200  $\mu$ m.

(l) Left: FACS contour plots of phagocytic activity of WAS-iMP1 and cWAS-iMP1; right: Replicates of fluorescent images as shown in Fig. 2d. Scale bar = 200  $\mu$ m.

(m) The FPKM value of the *WASL* gene in WT (n=2) and KO iMPs (n=3). Western blot of N-WASP (WASL) in WT and KO iMPs. PPIB: loading control.

All statistics in this figure were done using two-sided Student's t-test unless indicated otherwise. Data are shown as mean  $\pm$  SEM.

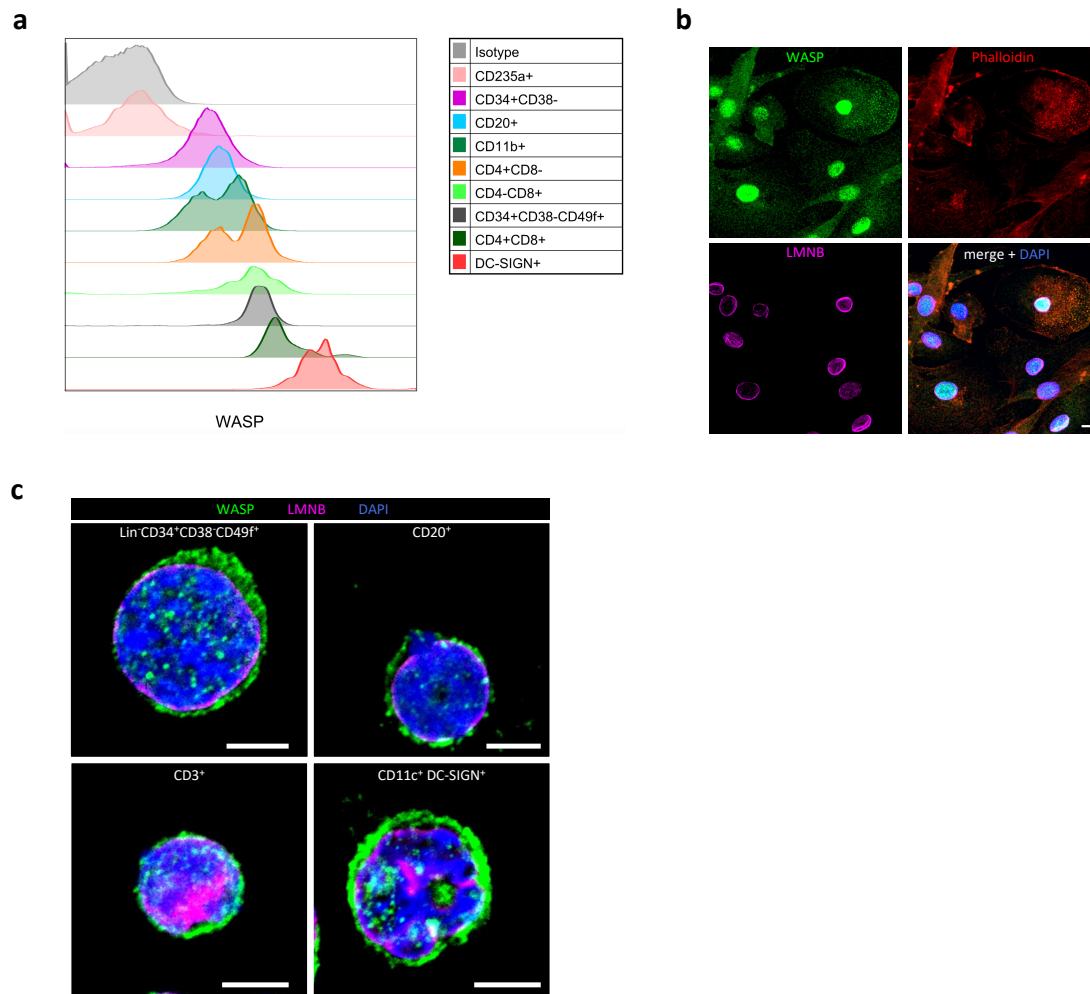

**Fig. S3 Localization of wild type WASP in hematopoietic lineages.**

(a) FACS analysis of WASP expression by intracellular staining in indicated hematopoietic lineages from human umbilical cord blood cells.

(b) Representative immunofluorescence images of nuclear and cytoplasmic localization of WASP in wild-type macrophages. Lamin B1 and phalloidin were used as nuclear and cytoplasmic landmarks, respectively. DNA was stained with DAPI. Bar = 10  $\mu$ m. The experiment was repeated at least 3 times independently.

(c) Representative immunofluorescence image of the nuclear and cytoplasmic localization of WASP in wild-type hematopoietic stem/progenitor cells (Lin<sup>-</sup>CD34<sup>+</sup>CD38<sup>-</sup>CD49f<sup>+</sup>), B cells (CD20<sup>+</sup>), T cells (CD3<sup>+</sup>) and dendritic cells (CD11c<sup>+</sup> DC-SIGN<sup>+</sup>). Note that blood cells have scant cytoplasm that is demarcated from the nucleus by LMNB staining. Green: WASP; Magenta: LMNB; Blue: DNA. Bar = 5  $\mu$ m. The experiment was done once.

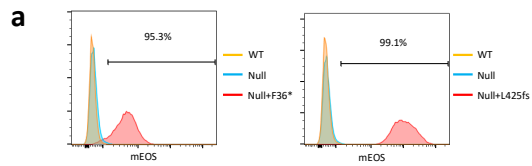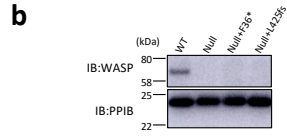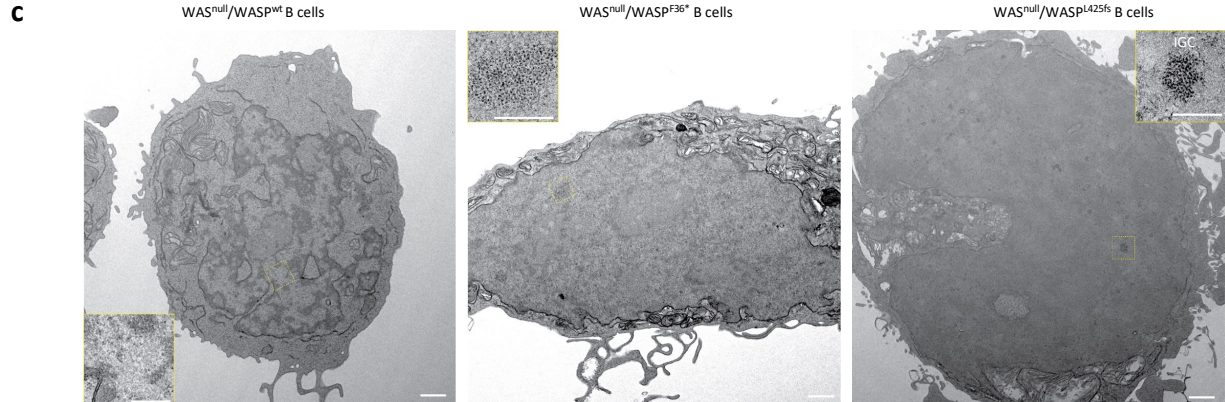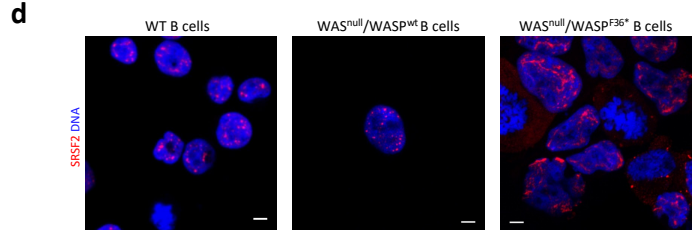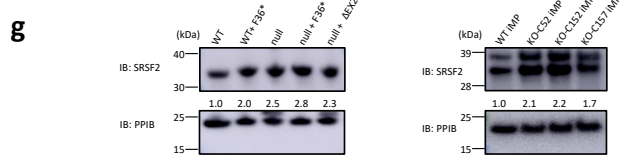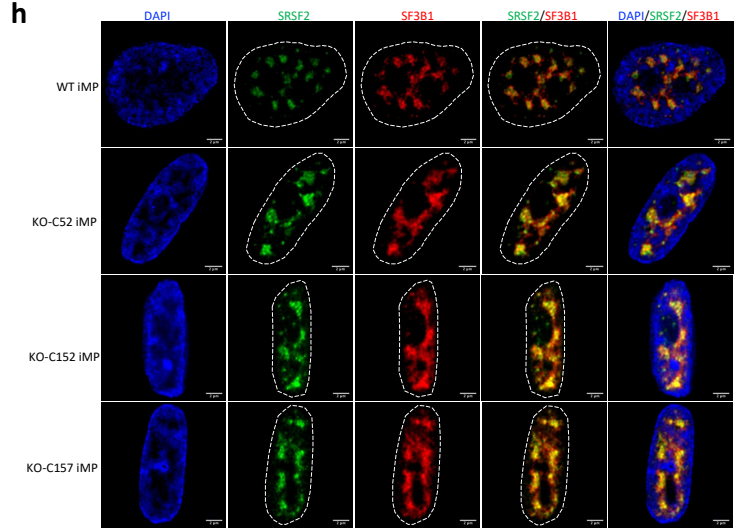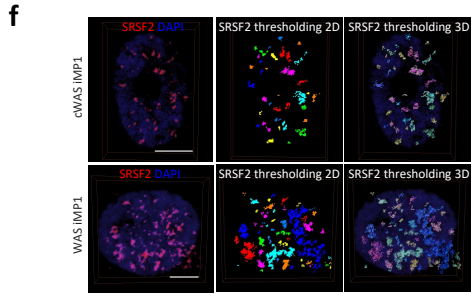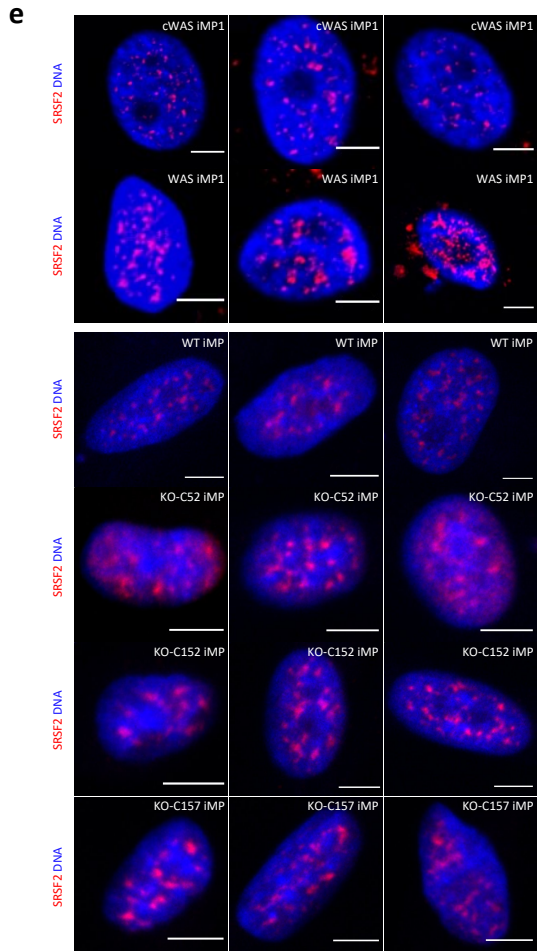

**Fig. S4 WASP deficiency results in striking changes in the morphology of nuclear speckles and overexpression of SRSF2 in B cell lines.**

- (a) Flow cytometry analysis of the expression of WASP<sup>F36\*</sup>-mEOS and WASP<sup>L425fs</sup>-mEOS in WASP<sup>null</sup> B cells.
- (b) Representative Western blot analysis of WASP in B cell lines with PPIB as a loading control. The experiment was repeated at least 3 times independently.
- (c) Representative TEM images of WASP<sup>null</sup> B cell lines overexpressing wild-type WASP, WASP<sup>F36\*</sup> and WASP<sup>L425fs</sup>. Bar = 1  $\mu$ m in large panels; Bar = 0.5  $\mu$ m in insets. IGC: interchromatin granule cluster. The experiment was done once.
- (d) Representative confocal immunofluorescence image of the nuclear speckle marker SRSF2. Nuclei were stained with DAPI. Bar = 5  $\mu$ m. The experiment was repeated at least twice independently.
- (e) Representative single-plane confocal images of cWAS iMP1s, WAS iMP1s, WT iMPs and KO iMPs. Scale bar = 5  $\mu$ m. The experiment was repeated at least 3 times independently.
- (f) Examples of segmentation of nuclear speckles in cWAS iMP1 and WAS iMP1. Scar bar = 5  $\mu$ m.
- (g) Representative Western blot analysis of SRSF2 protein in B cell lines, WT iMPs and KO-iMPs. PPIB was used as a loading control. The numbers represent the normalized expression value of SRSF2 relative to WT B cells or WT iMP cells. The experiment was repeated at least twice independently.
- (h) Representative single-plane confocal images of nuclear speckle markers, SRSF2 and SF3B1, in WT and KO-iMPs. Scale bar = 2  $\mu$ m. The experiment was repeated twice independently.

a

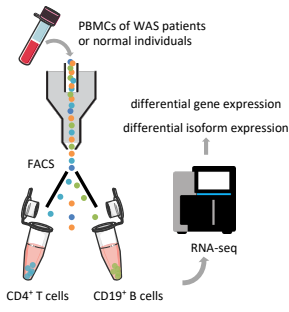

b

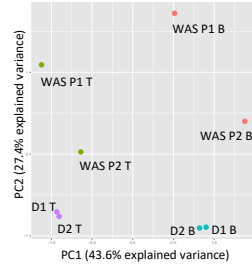

c

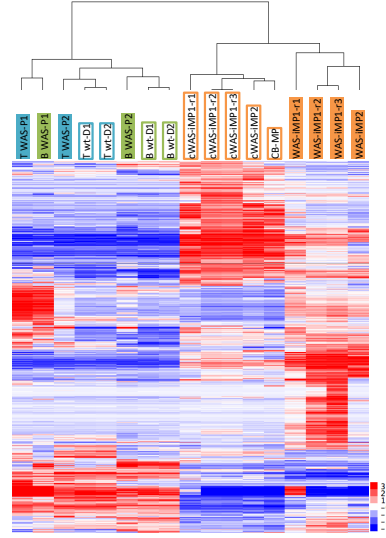

d

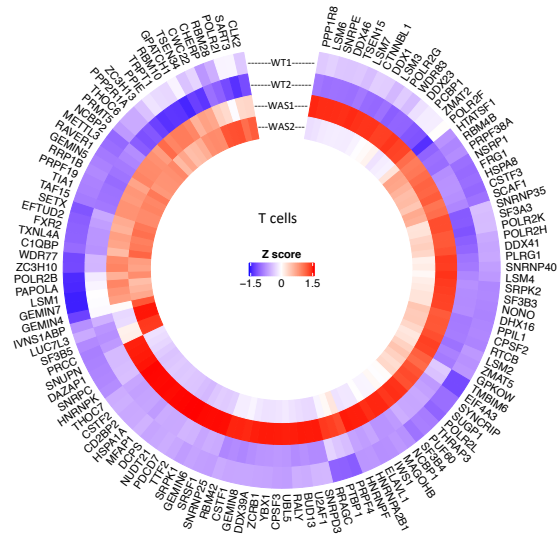

f

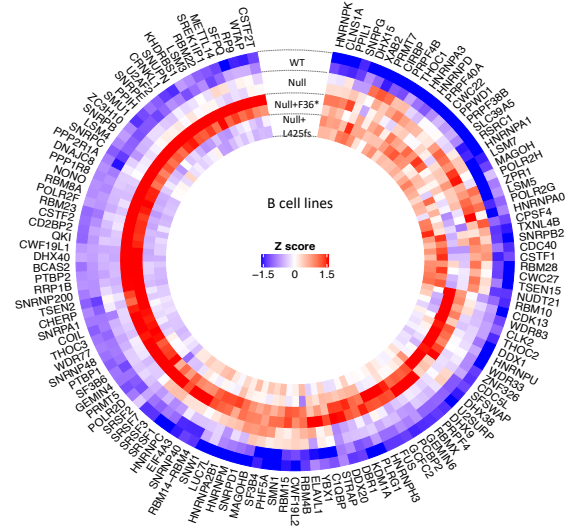

e

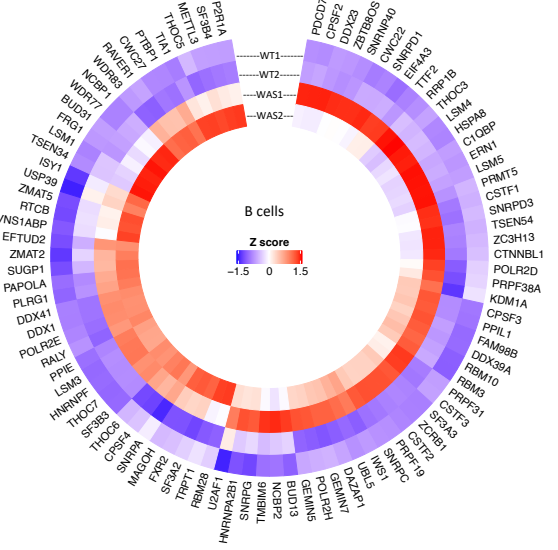

**Fig. S5 WASP deficiency increases the expression of splicing factors in B cell lines and primary T and B cells.**

- (a) A schematic diagram of the design of experiments of patient PBMCs.
- (b) PCA of RNA-seq data of patients (P1 and P2, clinical score of 4 and 2, respectively) and normal donors (D1 and D2).
- (c) Hierarchical clustering of all differentially expressed genes among indicated samples. Note that patient T and B cells formed separate clusters outside of the T or B cell clusters, indicating that disease-associated gene expression signature is dominant over the cell-type specific transcriptional program.
- (d) Heatmap of upregulated splicing factors in WAS-T cells, two replicates per cell line.
- (e) Heatmap of upregulated splicing factors in WAS-B cells, two replicates per cell line.
- (f) Heatmap of upregulated splicing factors in B cell lines, two replicates per cell line.

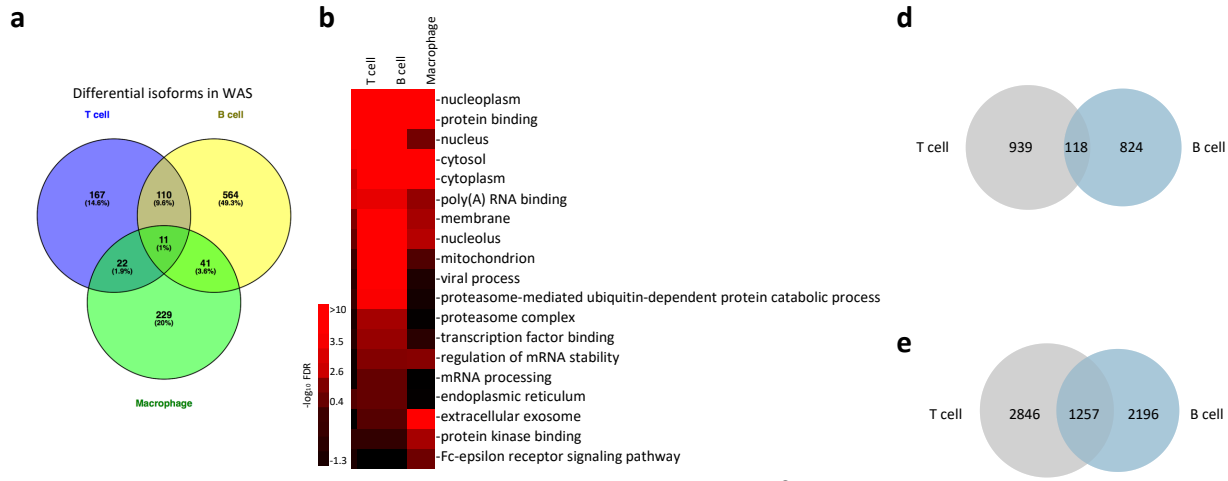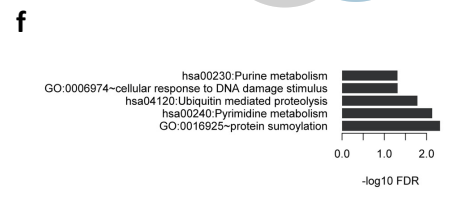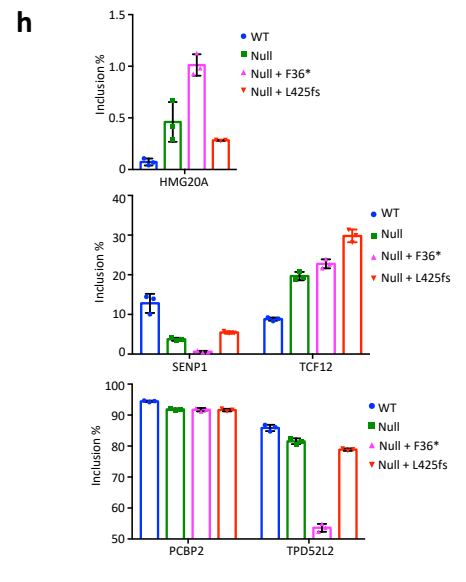

**i**

Motifs of AASE in Null+F36\* B cells

| Rank | Motif                | Name   | Hypergeometric p-value | Target % | Background % |
|------|----------------------|--------|------------------------|----------|--------------|
| 1    | AGAGAA <sup>GC</sup> | SRSF10 | 1e-13                  | 18.17    | 15.28        |
| 2    | TGGTGG <sup>CC</sup> | SRSF9  | 1e-13                  | 63.48    | 59.69        |
| 3    | G <sup>A</sup> AGGA  | SRSF1  | 1e-10                  | 31.36    | 28.31        |
| 4    | ACGACG               | SRSF7  | 1e-4                   | 2.78     | 2.15         |
| 5    | GGAGT <sup>I</sup>   | SRSF2  | 1e-4                   | 46.06    | 44.06        |
| 6    | TTGGTT <sup>I</sup>  | SFPQ   | 1e-5                   | 38.61    | 36.3         |

**j**

Motifs of AASE in Null+L425fs B cells

| Rank | Motif                | Name   | Hypergeometric p-value | Target % | Background % |
|------|----------------------|--------|------------------------|----------|--------------|
| 1    | AGAGAA <sup>GC</sup> | SRSF10 | 1e-9                   | 20.14    | 16.15        |
| 2    | TGGTGG <sup>CC</sup> | SRSF9  | 1e-7                   | 62.13    | 57.73        |
| 3    | GGAGT <sup>I</sup>   | SRSF2  | 1e-7                   | 48.06    | 43.67        |
| 4    | G <sup>A</sup> AGGA  | SRSF1  | 1e-5                   | 31.37    | 28.12        |
| 5    | ACGACG               | SRSF7  | 1e-4                   | 3.01     | 2.02         |
| 6    | TTGGTT <sup>I</sup>  | SFPQ   | 1e-6                   | 41.4     | 37.48        |



**Fig. S6 WASP mutations disrupt normal AS programs, related to Fig. 4.**

- (a) Venn diagram shows shared and distinct differentially expressed isoforms in the three cell types.
- (b) Heatmap shows GO enrichment of differentially expressed isoforms in the three cell types.
- (c) GO enrichment of genes with differentially used junctions detected by Junction-seq between T cells from WAS patients (n = 2) and normal donors (n = 2).
- (d) Venn diagram showing the number of exons that are repressed in B and T cells from WAS patients compared to those from normal individuals.
- (e) Venn diagram showing the number of exons that are promoted in B and T cells from WAS patients compared to those from normal individuals.
- (f) GO Biological Process and KEGG pathway enrichment in genes containing commonly promoted exons in B and T cells from patients (n=2) with WAS.
- (g) Isoform-level analysis of RNAseq data of macrophages and B cell lines. The graph below shows RNA-seq reads mapped to the cassette exon (middle) and its neighboring exons of the *SEN1* and *PCBP2* genes. The numbers above the IGV tracks represent the percentage of exon-retained isoform in total isoforms.
- (h) Selected AASEs validated by probe-based qPCR. The qPCR was performed in triplicate per sample, data are shown as mean  $\pm$  SD, mutant cell lines n = 3.
- (i) Splicing factor motif analysis from downstream exon of altered SE in WASP<sup>null+F36\*</sup> B cells. Hypergeometric testing p values are shown in the table.
- (j) Splicing factor motif analysis from downstream exon of altered SE in WASP<sup>null+L425fs</sup> B cells. Hypergeometric testing p values are shown in the table.

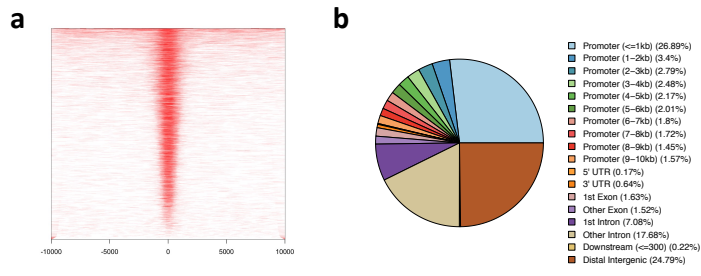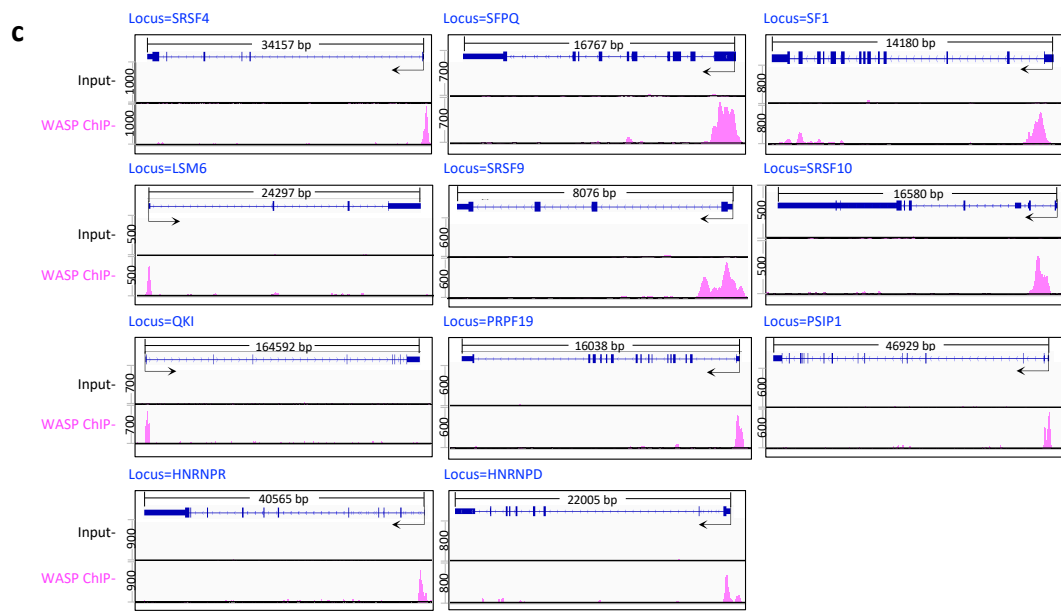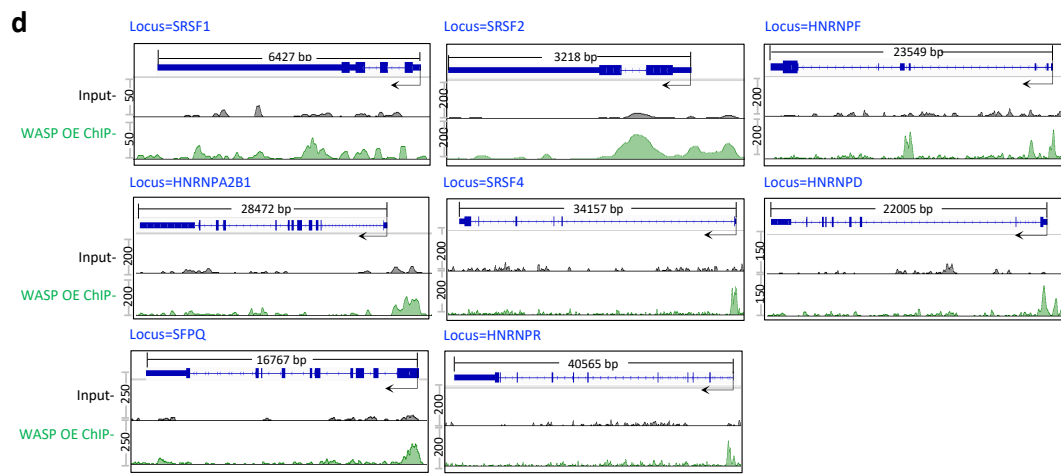

Top 5 de novo motifs from upregulated splicing factors associate with WASP binding

**e**

|   | Motif | p-value | Target % | Background % | Fold enrichment | Best known match |
|---|-------|---------|----------|--------------|-----------------|------------------|
| 1 |       | 1e-25   | 61.26    | 12.05        | 5.1             | ZNF460 (ZF)      |
| 2 |       | 1e-24   | 33.33    | 1.11         | 3.0             | SeqBias          |
| 3 |       | 1e-20   | 37.84    | 3.52         | 10.8            | KLFI5 (ZF)       |
| 4 |       | 1e-18   | 40.54    | 5.59         | 7.3             | ZNF189 (ZF)      |
| 5 |       | 1e-17   | 63.06    | 19.88        | 3.2             | PCBP3 (KH)       |

**Fig. S7 Location of WASP CHIP peaks on splicing factor genes, related to Fig. 5-6.**

- (a) Heatmap of WASP CHIPseq peaks in TSS regions in the genome of WASP<sup>null</sup> B cells overexpressing wild-type WASP cDNA. X-axis is shown in bp.
- (b) Pie chart visualizing genomic annotation of WASP CHIPseq peaks from WASP<sup>null</sup> B cells overexpressing wild-type WASP.
- (c) Location of WASP CHIPseq peaks of WT B cells in SF genes shown in Integrative Genomics Viewer (IGV).
- (d) Location of WASP CHIPseq peaks of WASP-overexpressing WASP<sup>null</sup> B cells in SF genes shown in IGV.
- (e) Top 5 de novo motifs in the promoter regions of upregulated SFs bound by WASP. Hypergeometric testing p values are shown in the table.

**a**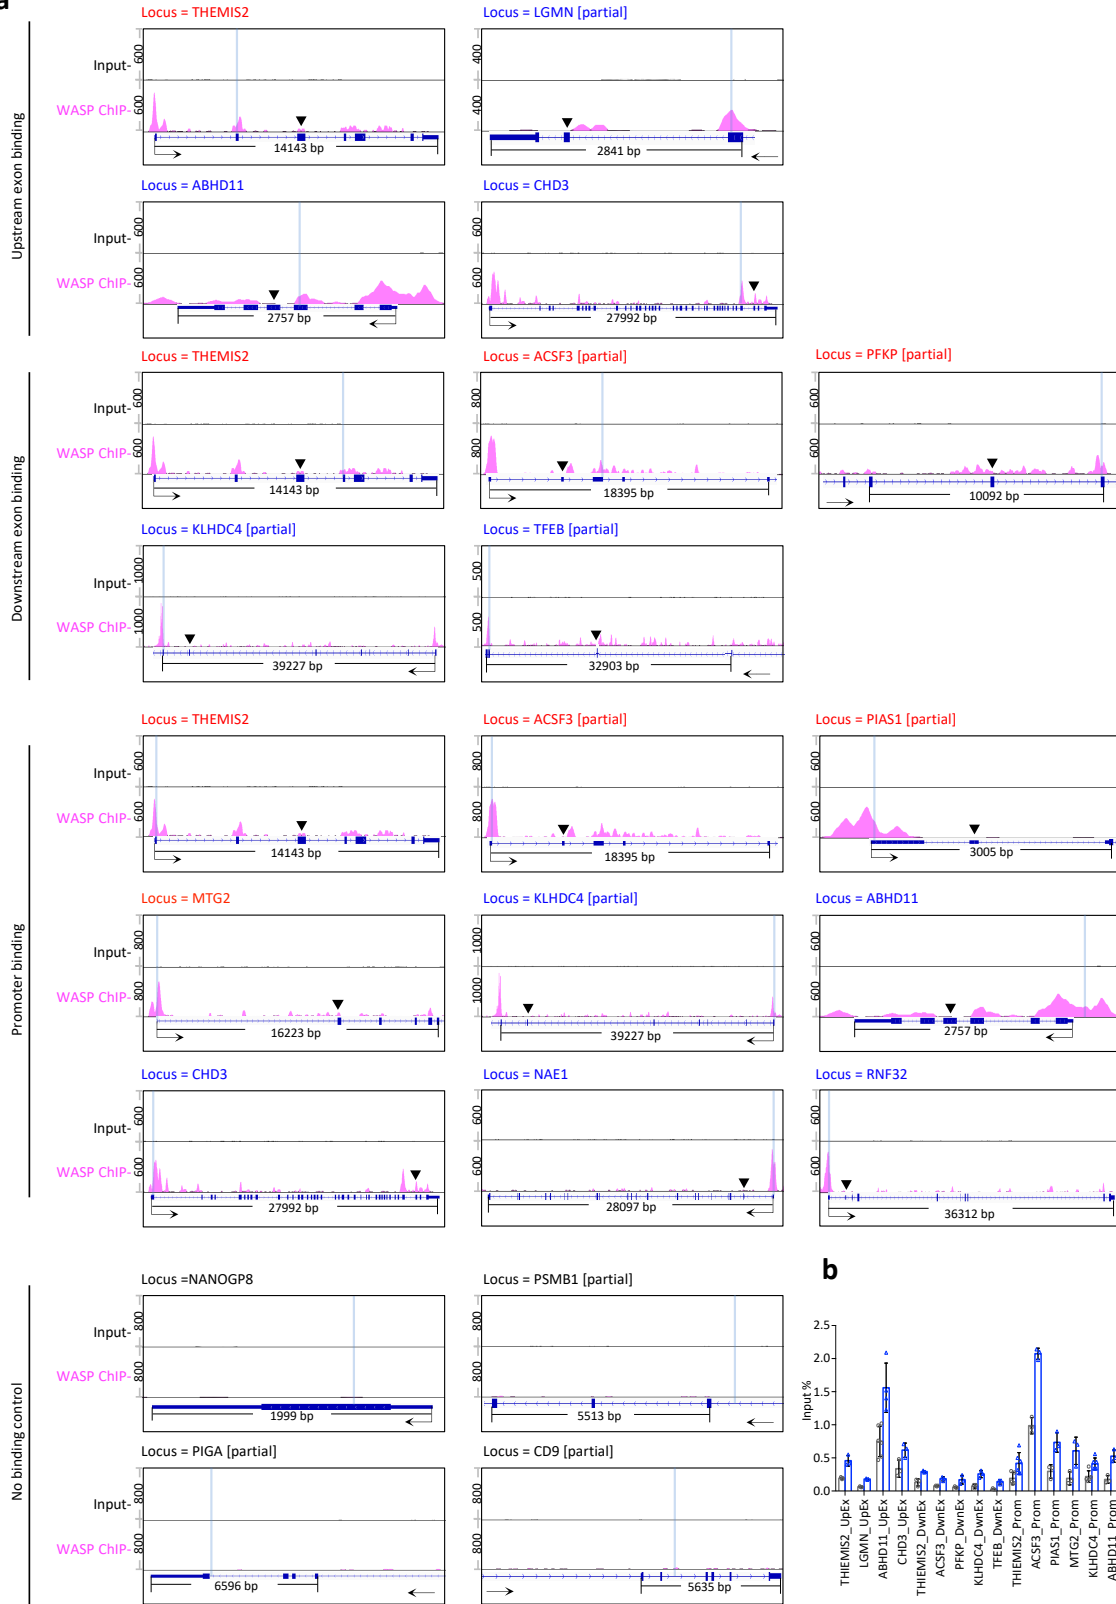**b**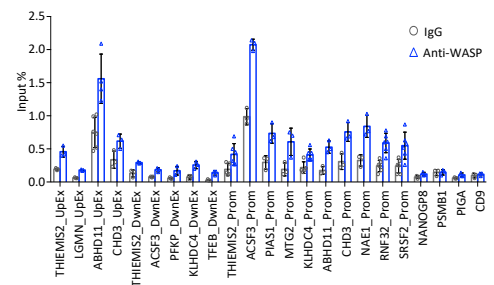

**Fig. S8 ChIP-qPCR Validation for WASP ChIPseq data, related to Fig. 5-6 and Fig. S7.**

(a) Location of WASP ChIPseq peaks of WT B cells in selected AASE genes shown in IGV. The input track is shown above the corresponding WASP ChIPseq track using the same scale. Black triangle indicates the cassette exon; light blue vertical line indicates the center of the qPCR amplicon; elbow arrow below the gene models shows the transcription start site and the direction of transcription; straight arrow in partial gene view shows the direction of transcription; red gene name indicates more inclusion of the cassette exon in WASP deficient cells, blue more exclusion, and black negative control.

(b) ChIP-qPCR validation of WASP ChIPseq data for genes in Fig. S8a, S7d and Fig. 5c. UpEx: upstream exon. DwnEx: downstream exon. Prom: Promoter. WASP ChIP was independently repeated twice in WT B cells and once in WASP-overexpressing WAS<sup>null</sup> B cells. The qPCR was performed in triplicate per sample, data are shown as mean  $\pm$  SD, analyzed loci n = 23.

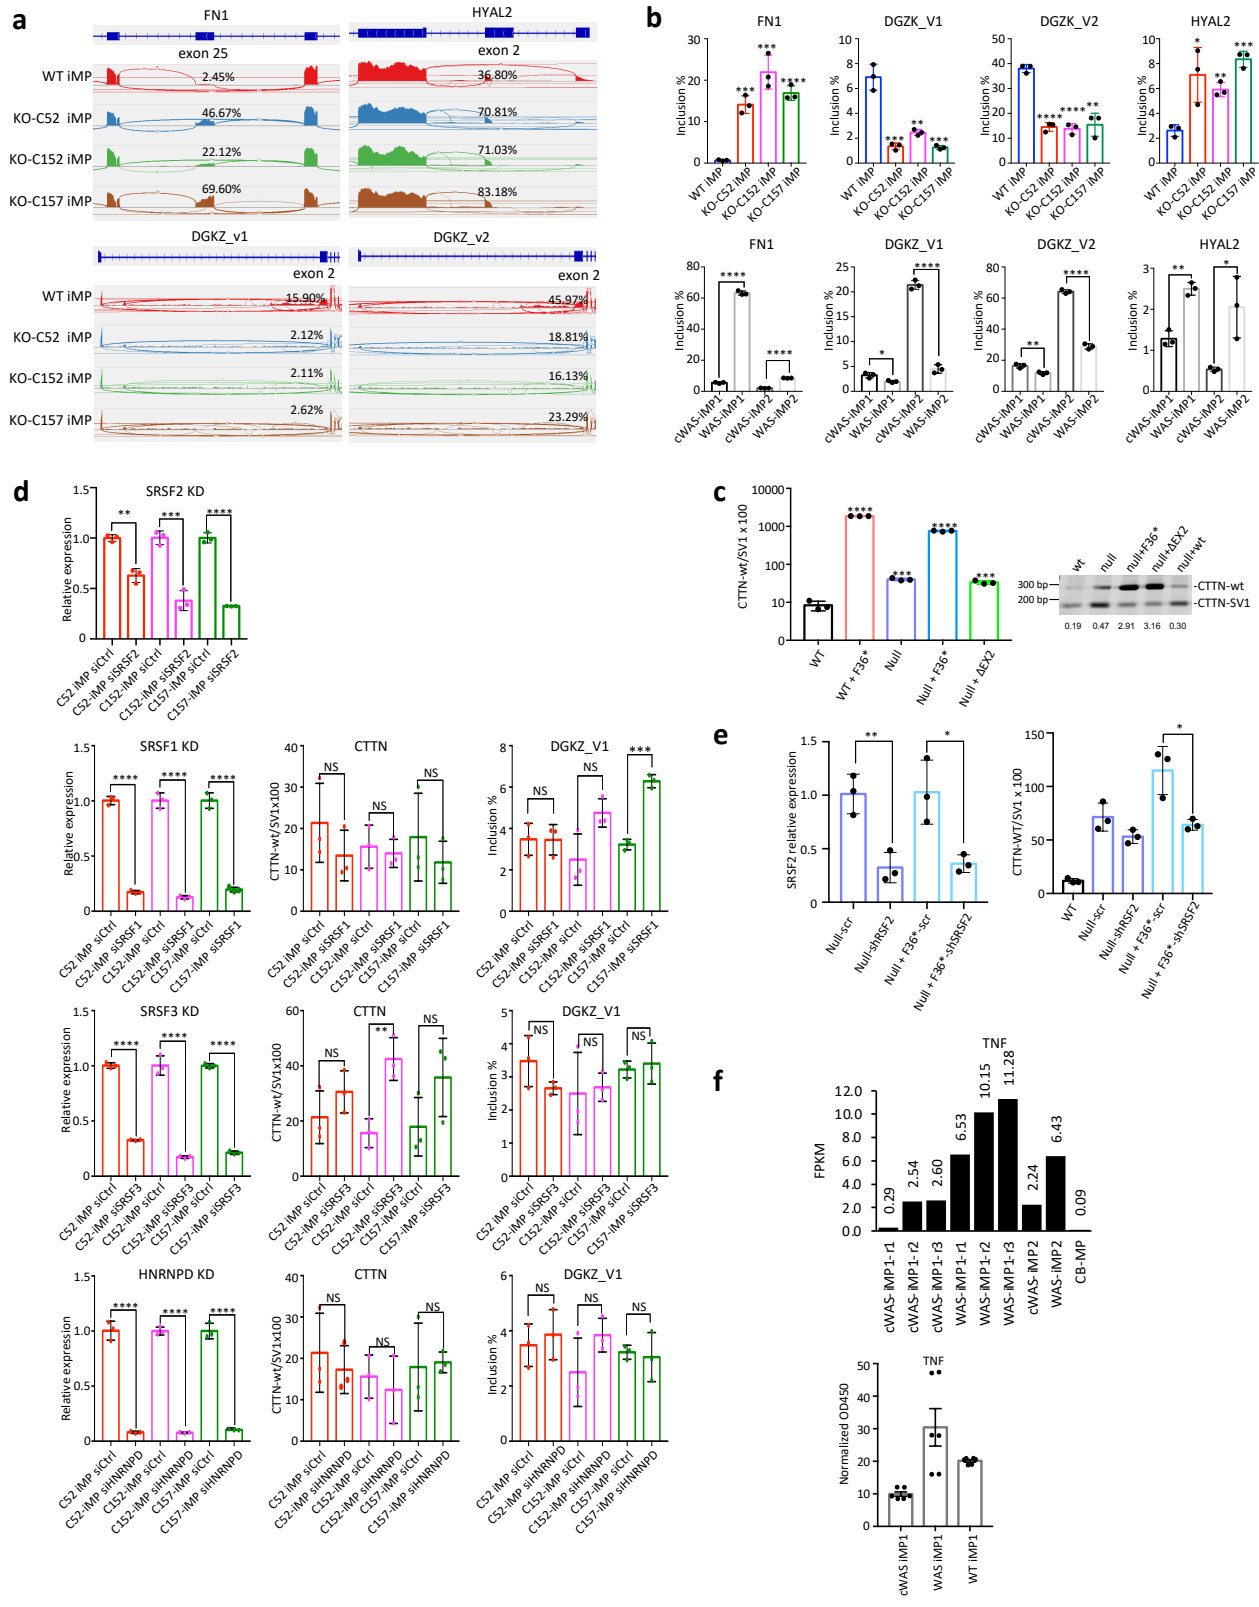

### Fig. S9 Validation of AASEs and rescue of WAS phenotype, related to Fig. 5.

- (a) Sashimi plot of selected AASEs in genes associated with the GSEA immunity gene set in WAS mutant iMPs.
- (b) Exon-specific qPCR validation for the selected AASEs shown in (a). Biological replicate  $n = 3$ . Data are shown as mean  $\pm$  SD. Two-sided Student's t-test. *FN1*: \*\*\* $p = 0.0004$  (KO-C52 iMP), \*\*\* $p = 0.0008$  (KO-C152 iMP), \*\*\*\* $p < 0.0001$ ; *DGZK\_V1*: \* $p = 0.0192$ , \*\* $p = 0.002$ , \*\*\* $p = 0.0009$  (KO-C52 iMP), \*\*\* $p = 0.0007$  (KO-C157 iMP), \*\*\*\* $p < 0.0001$ ; *DGZK\_V2*: \*\* $p = 0.0013$  (KO-C157 iMP), \*\* $p = 0.0079$  (WAS-iMP1), \*\*\*\* $p < 0.0001$ ; *HYAL2*: \* $p = 0.0262$  (KO-C52 iMP), \* $p = 0.0251$  (WAS-iMP2), \*\* $p = 0.0015$  (KO-C152 iMP), \*\* $p = 0.001$  (WAS-iMP1), \*\*\* $p = 0.0002$ .
- (c) Exon-specific qPCR validation for the *CTTN* AASE in B cell lines. Biological replicate  $n = 3$ . Data are shown as mean  $\pm$  SD. Two-sided Student's t-test, \*\*\* $p = 0.0001$  (Null), \*\*\* $p = 0.0005$  (Null +  $\Delta$ EX2), \*\*\*\* $p < 0.0001$ .
- (d) Left column: qPCR validation of the knockdown of SFs. Middle and right columns: exon-specific qPCR analysis of AASEs in after siRNA mediated knockdown of upregulated splicing factors (*SRSF1*, *SRSF2*, *SRSF3*, *HNRNPD*) in KO iMPs, related to Fig. 5h. Biological replicate  $n = 3$ . Data are shown as mean  $\pm$  SD. Two-sided Student's t-test, \*\* $p = 0.0011$  (*SRSF2*), \*\* $p = 0.0076$  (*CTTN*), \*\*\* $p = 0.0008$  (*SRSF2*), \*\*\* $p = 0.0002$  (*DGKZ\_V1*), \*\*\*\* $p < 0.0001$ .
- (e) *CTTN* splicing is rescued by knocking down *SRSF2* in WASP mutant (null and null+F36\*) B cells. Biological replicate  $n = 3$ . Data are shown as mean  $\pm$  SD. Two-sided Student's t-test, *SRSF2*: \* $p = 0.0204$ , \*\* $p = 0.0069$ ; *CTTN*: \* $p = 0.0188$ .
- (f) TNF expression levels in WAS iMPs and cWAS iMPs. Top: The RNAseq data of TNF mRNA expression level, biological replicate for WAS-iMP1  $n = 3$ , for cWAS-iMP1  $n = 3$ , for WAS-iMP2  $n = 1$ , for cWAS-iMP2  $n = 1$ , for CB-iMP  $n = 1$ . Bottom: ELISA quantitation of secreted TNF in the indicated macrophages upon stimulation with lipopolysaccharide (LPS). Values shown are as mean  $\pm$  SEM. Biological replicate  $n = 3$ .



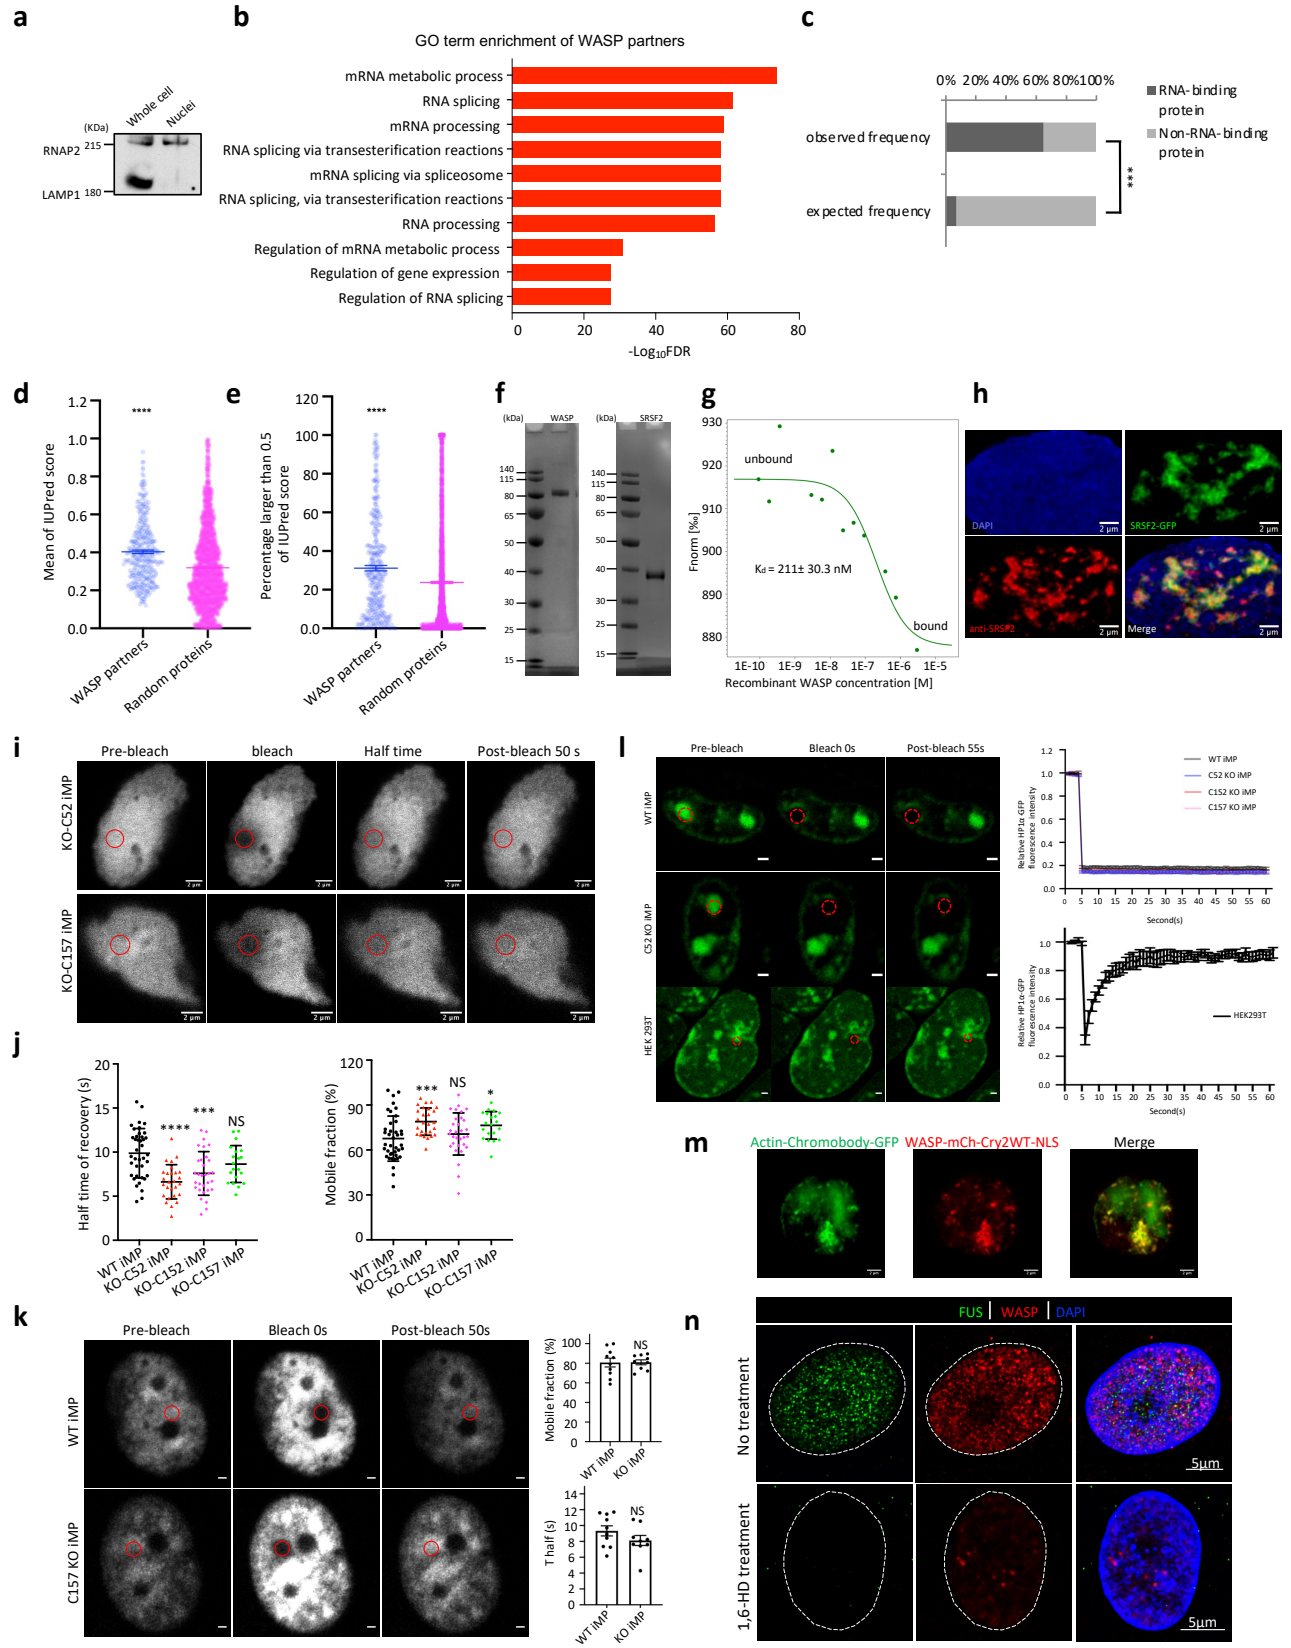

**Fig. S10 Characterization of WASP binding partners and WASP condensates, related to Fig. 6-7.**

(a) Western blot analysis of lysosomal-associated membrane protein 1 (LAMP1) and RNA polymerase II (RNAP2) in whole cell and nuclei lysates. The experiment was done once.

(b) GO term enrichment of 99 WASP partners.

(c) Quantitation of known RNA-binding proteins (n=200) in the WASP interactome.  $\chi^2$  test, \*\*\* $p < 0.0001$ .

(d, e) Mean IUPred score (d) and the percentage of proteins with IUPred score > 0.5 (e) in 342 WASP partners and 3000 random proteins. Data are shown as mean  $\pm$  SEM. Mann Whitney test, \*\*\*\* $p < 0.0001$ .

(f) Representative Coomassie-stained SDS-PAGE images of full-length human WASP and SRSF2. The experiment was repeated 3 times independently.

(g) MST of the binding interaction between SRSF2 and WASP. The  $k_d$  value is shown as mean  $\pm$  SEM, biological replicate n=3.

(h) Representative confocal images of exogenous SRSF2-GFP and antibody staining of SRSF2. Scale bar = 2  $\mu$ m. The experiment was repeated twice independently.

(i-k) Representative FRAP images (i) and quantitative analysis (j) of the half time of FRAP recovery and mobile fraction of SRSF2-GFP fluorescence. Scale bar = 2  $\mu$ m. Two-sided Student's t-test. Data are shown as mean  $\pm$  SD. Biological replicate n=3, \* $p = 0.0195$ , \*\*\* $p < 0.0006$  (KO-C152 iMP), \*\*\* $p = 0.0009$  (KO-C52 iMP), \*\*\*\* $p < 0.0001$ . The experiment was repeated 3 times independently. In (k), cells were bleached at the positions with a clear speckled GFP signal. Scale bar = 1  $\mu$ m. n=10 for WT iMPs, 9 for KO iMPs. Data are shown as mean  $\pm$  SD. Two-sided Student's t-test, NS: not significant.

(l) Representative FRAP images and time-lapse FRAP curves of HP1 $\alpha$ -GFP fluorescence. n=15 (WT and KO iMPs), 8 (HEK293T). Data are shown as mean  $\pm$  SEM. Scale bar = 1  $\mu$ m.

(m) Live-cell confocal images of WASP and nuclear actin (GFP-tagged nuclear actin chromobody) in HEK293 cells. Scale bar = 2  $\mu$ m. The experiment was repeated 3 times independently.

(n) Immunofluorescence of FUS and endogenous WASP in WT iMPs with or without 1,6-HD treatment. Scale bar = 5  $\mu$ m. The experiment was repeated 3 times independently.

Source data for d, e, j, and k are provided as a Source Data file.

**a**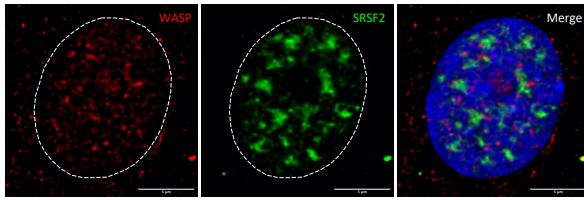**b**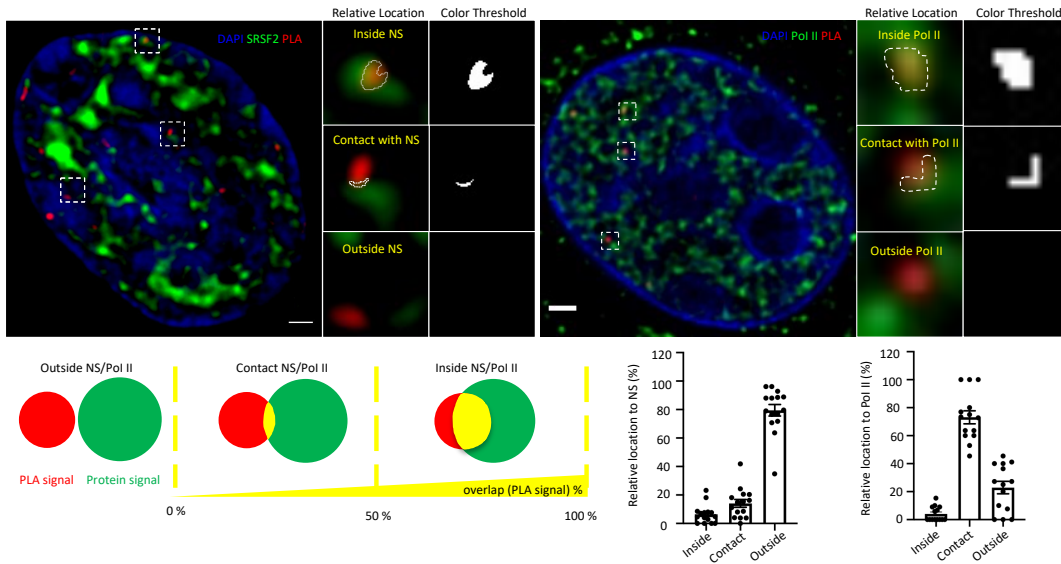**c**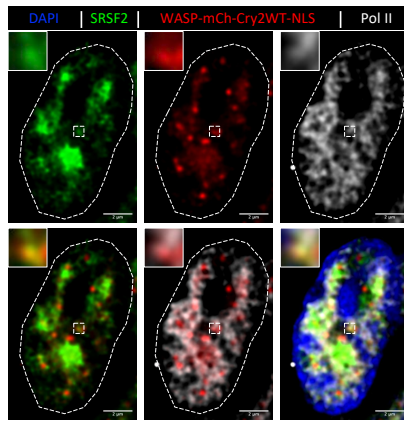

Pearson's  $r = 0.58 \pm 0.11$  (n=16)

Pearson's  $r = 0.60 \pm 0.12$  (n=16)

**d**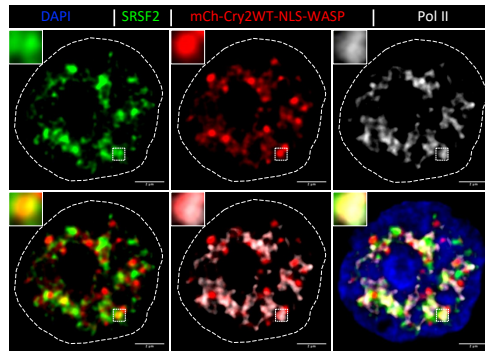

Pearson's  $r = 0.50 \pm 0.17$  (n=12)

Pearson's  $r = 0.58 \pm 0.19$  (n=12)

**e**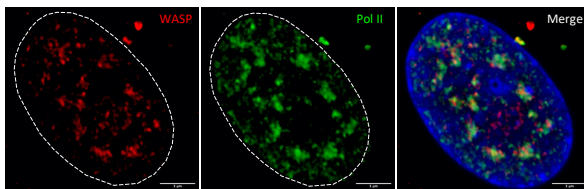**f**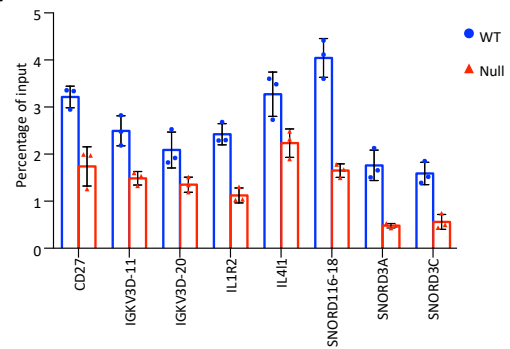

**Fig. S11 Colocalization of WASP with SRSF2, Pol II and nascent RNA related to Fig. 7.**

(a) Representative maximum projection of confocal images of endogenous WASP. Scale bar = 5  $\mu\text{m}$ . The experiment was repeated at least 3 times independently.

(b) Upper: representative single-plane confocal images of PLA signals for WASP-SRSF2 and SRSF2 immunofluorescence signals (left) and for WASP-Pol II and Pol II immunofluorescence signals (right). SRSF2<sup>bright</sup> foci label nuclear speckles (NS). Insets: magnified view of boxed locations. Lower left: schematic diagrams of the categories for quantitative analysis. We define no overlap between PLA signals and SRSF2 or Pol II signals as “outside”, 0-50% overlap signals to total PLA signals as “contact”, and 50-100% as “inside”. Lower right: statistics of the relative location of PLA signals to SRSF2 or Pol II signals. 487 PLA signals from 15 cells were quantified for the relative location to NSs. 167 PLA signals from 15 cells were quantified for the relative location to Pol II. Data are shown as mean  $\pm$  SEM.

(c, d) Representative single-plane confocal images and colocalization analysis of optoWASP droplets (N-terminal WASP, c) and optoWASP droplets (C-terminal WASP, d) with endogenous SRSF2 and active Pol II, respectively. Scale bar = 2  $\mu\text{m}$ . Insets show the framed region in the images. The Pearson correlation coefficient of colocalization (Pearson’s *r*) value was calculated using the Leica LAS X software. Analyzed image *n* = 16 in c, *n* = 12 in d, data are shown as mean  $\pm$  SD.

(e) Representative maximum Z-projection of confocal images of endogenous WASP co-stained with Pol II. Scale bar = 3  $\mu\text{m}$ . The experiment was repeated twice independently.

(f) Selected RNA immunoprecipitation (RIP) events validated by qPCR. RIP was independently repeated twice. The qPCR was performed in triplicate per sample, data are shown as mean  $\pm$  SD, analyzed loci *n* = 8.

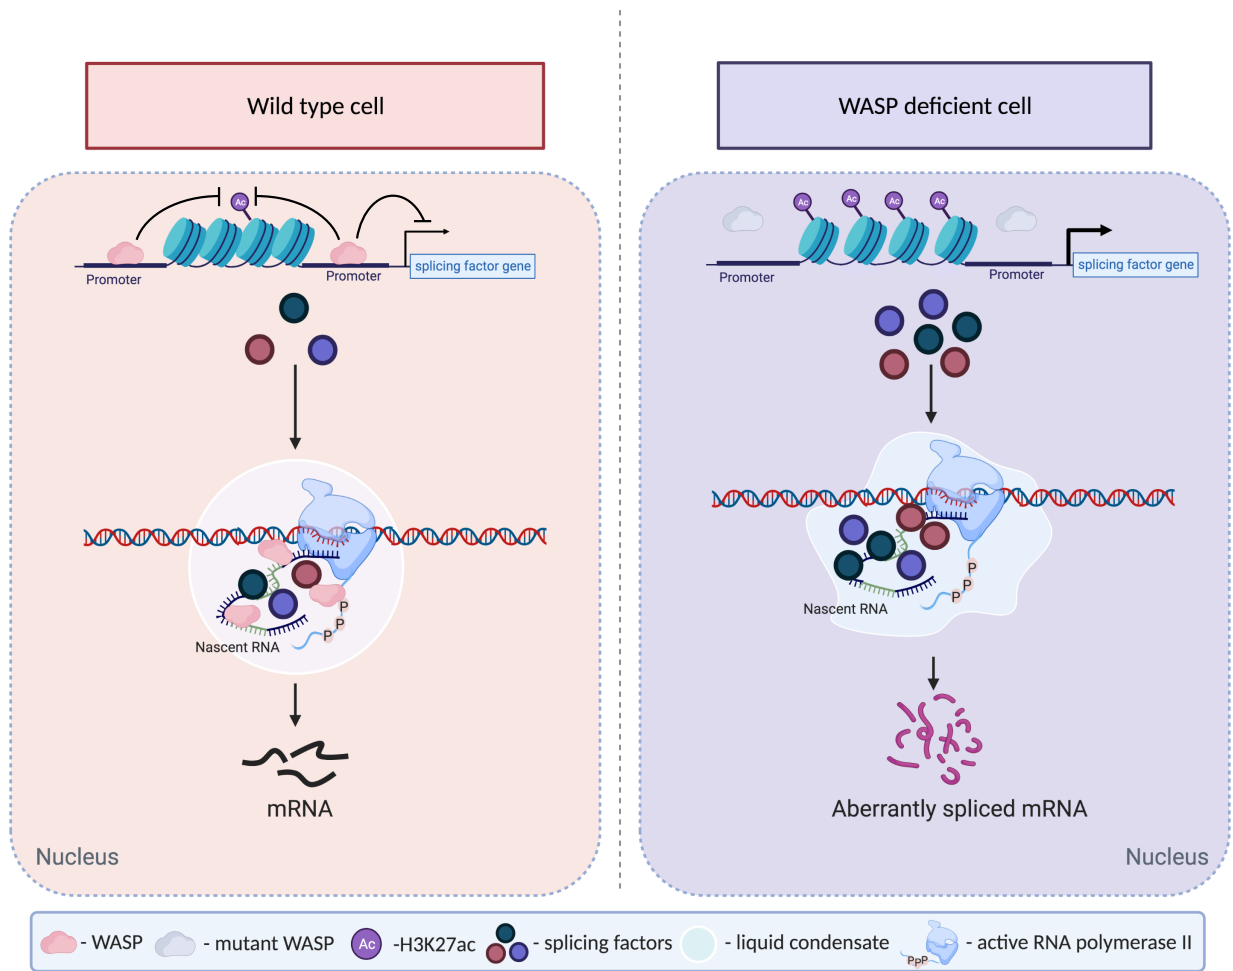

**Fig. S12 Models of the mechanisms by which WASP regulates splicing.**

Created with BioRender.com
