# Supplementary material for: Wiskott-Aldrich syndrome protein forms nuclear condensates and regulates alternative splicing
Source: PubMed Central journal article supplement (PMC9233711; doi:10.1038/s41467-022-31220-8), 2022-06-25
Supplement: 41467_2022_31220_MOESM2_ESM.pdf [file 41467_2022_31220_MOESM2_ESM.pdf]

## **Description of Additional Supplementary Files**

File name: Supplementary Data 1

Description: List of upregulated splicing factors in WAS KO-iMPs from DIA-MS data.

File name: Supplementary Data 2

Description: List of AASE in genes associated with immunity.

File name: Supplementary Data 3

Description: List of WASP partners identified by MudPIT.

File name: Supplementary Data 4

Description: List of genes identified by RIPseq.

File name: Supplementary Data 5

Description: List of oligonucleotides.

File name: Supplementary Data 6

Description: List of antibodies.

File name: Supplementary Data 7

Description: Gating strategy for FACS plots.

File name: Supplementary Movie 1

Description: A time-lapse movie of optoWASP activated by blue light.

File name: Supplementary Movie 2

Description: A time-lapse movie of N-terminal IDR of WASP fused with Cry2 optogenetic tool activated by blue light.

File name: Supplementary Movie 3

Description: A time-lapse movie of C-terminal IDR of WASP fused with Cry2 optogenetic tool activated by blue light.

File name: Supplementary Movie 4

Description: A time-lapse movie of optoWASP droplet fusion.
