# Supplementary material for: Wiskott-Aldrich syndrome protein forms nuclear condensates and regulates alternative splicing
Source: PubMed Central journal article supplement (PMC9233711; doi:10.1038/s41467-022-31220-8), 2022-06-25

# Gating Strategy for FACS plots

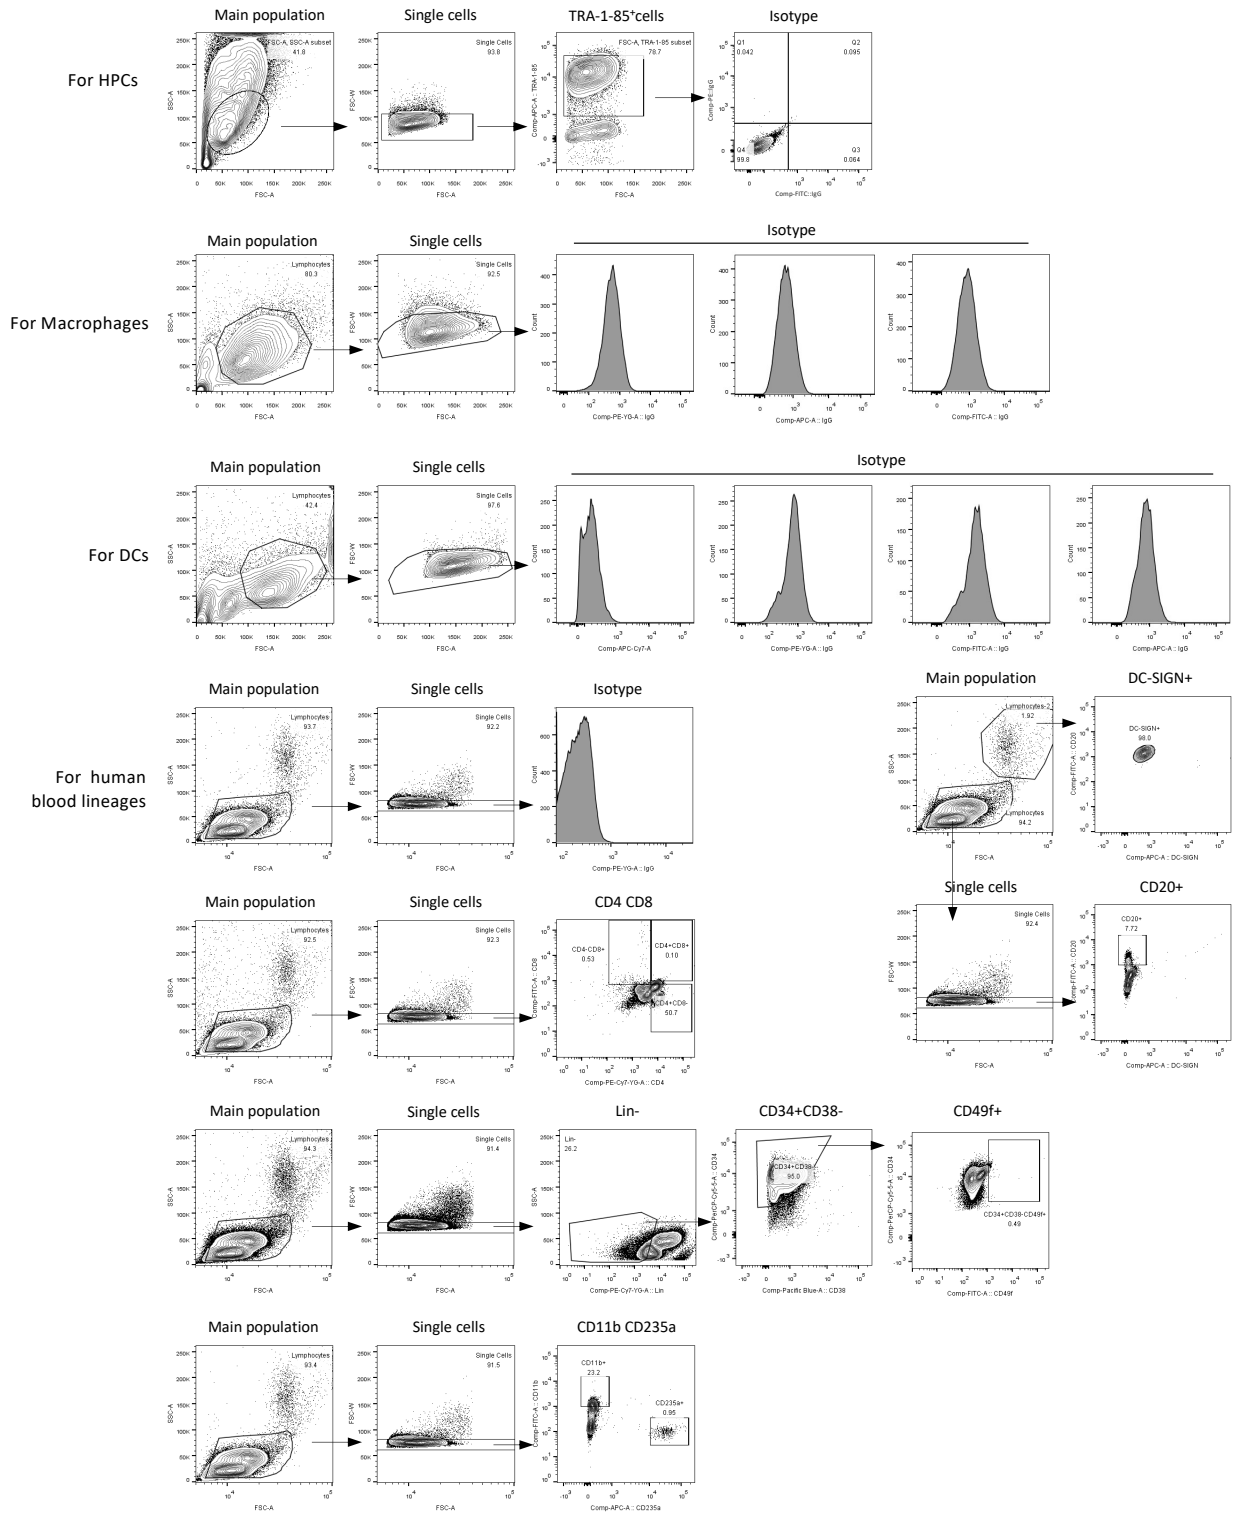

Supplement: 41467_2022_31220_MOESM9_ESM.pdf [file 41467_2022_31220_MOESM9_ESM.pdf]
